# Supplementary material for: Survival and long-term outcomes following in-hospital cardiac arrest in a Swiss university hospital: a prospective observational study
Source: Scand J Trauma Resusc Emerg Med. 2021 Aug 11;29:115. doi: 10.1186/s13049-021-00931-0 (PMC8359113; doi:10.1186/s13049-021-00931-0)
Supplement: Supplementary file 1 — Additional file 1. Utstein-style case report form. [file 13049_2021_931_MOESM1_ESM.pdf]

CPR-Protocol

Time: Alarm until →

Arrival of ALS at Patient:

Chest Compression:

Defibrillation:

Drugs:

Patient data

Participant-ID:

Gender: ☐Male ☐Female

Day:

Time:

Type of survey: ☐Witnessed ☐Enquiry

Location at Inseispital/Bern University Hospital:

Initial reason for hospital attendance:

Comments:

Alarm

Dispatcher identified presence of cardiac arrest ☐Yes ☐No

Dispatcher provided CPR instructions ☐Yes ☐No

Witnessed cardiac arrest ☐Bystander wit. ☐BLS wit. ☐Not wit.

Bystander or BLS Response ☐Compression ☐Ventilation ☐No CPR  
☐AED/Defi. used → ☐Shock delivered

Reason for alarm ☐Respiratory Rate < 6 or > 35/min ☐O2 sat. < 90  
☐Blood pressure < 90 or increase > 40 mmHg ☐Heart rate < 40 or > 140/min  
☐GCS decrease ≥ 2 ☐Epileptic seizure ☐Seriously worried about patient

False Alarm? (no CPR) ☐Yes ☐No

If Yes → please explain:

B

Ventilation: ☐Yes ☐No

Airway control (please note sequence) ☐Bag-valve-mask ☐Naso-/Oropharyngeal ☐Tracheal tube ☐Supraglottic ☐Surgical ☐None ☐Unknown

C

Cardiac arrest confirmed by ALS team? ☐On arrival ☐Occurred after arrival ☐No → please explain

Monitored rhythm (in order of occurrence) ☐Asystole ☐PEA ☐Pulsless VT ☐VF ☐Normal/SR or no CPR ☐Unknown

Etiology ☐Cardiac ☐Pulmonal ☐Anaphylactic ☐Drug overdose/Intoxikation ☐Sepsis  
☐Neurological/Stroke ☐Trauma ☐Unknown ☐Other → please explain

Comorbidities ☐No ☐Unknown ☐Yes → please explain

Implanted cardioverter-defibrillator ☐Yes ☐No ☐Unknown

Ventricular Assist Device ☐Yes ☐No ☐Not recorded

Presence of STEMI ☐Yes ☐No ☐Unknown

Type of reperfusion attempted ☐Angiography only ☐PCI ☐Thrombolysis ☐None ☐Unknown

Timing of reperfusion attempted ☐Intra-arrest ☐Within 24 h of ROSC ☐> 24 h but before discharge ☐Unknown

Comments:

Resuscitation by ALS team

Resuscitation attempted ☐Yes ☐No

Chest compression ☐Yes ☐No

Mechanical CPR ☐No ☐Yes → Please note type of device:

Defibrillation ☐Yes ☐No

Number of shocks

External or temporary pacemaker ☐Yes ☐No

Drugs given ☐Adrenaline ☐Amiodarone ☐Atropine ☐Vasopressin (ADH) ☐Noradrenaline ☐Other:

Primary vascular access used during arrest ☐PVC ☐CVC ☐IO ☐IM ☐Endotracheal ☐Unknown ☐Other:

CPR quality measured ☐No ☐Yes → please explain/note type of device:

ROSC at any time achieved ☐Yes ☐No ☐Unknown

Targeted oxygenation/ventilation after ROSC ☐Yes ☐No ☐Unknown

Targeted blood pressure management after ROSC ☐Yes, target: mmHg ☐No ☐Unknown

Targeted temperature management ☐Yes, target: °C ☐No ☐Unknown

pH ☐No ☐Yes → please note value

Lactate ☐No ☐Yes → please note value

Glucose ☐No ☐Yes → please note value

Extracorporeal life support (ECLS) ☐Intra-arrest/Before ROSC ☐After ROSC ☐Not used ☐Unknown

Intra-aortic balloon pump (IABP) ☐Yes ☐No ☐Unknown

12-Lead ECG after ROSC? ☐Yes ☐No ☐Unknown

After Resuscitation

Survived event (until arriving at ICU) (GOS) ☐1. Death ☐2. Persistent vegetative state ☐3. Severe disability ☐4. Moderate dis. ☐5. Low dis.

24 h survival (GOS) ☐1. Death ☐2. Persistent vegetative state ☐3. Severe disability ☐4. Moderate dis. ☐5. Low dis.

30 days survival or survival to discharge (GOS) ☐1. Death ☐2. Persistent vegetative state ☐3. Severe dis. ☐4. Moderate dis. ☐5. Low dis.

Quality of life after 30 days or at discharge (SF12) PCS: MCS:

12 months survival (GOS) ☐1. Death ☐2. Persistent vegetative state ☐3. Severe disability ☐4. Moderate dis. ☐5. Low dis.

Quality of life after 12 months (SF12) PCS: MCS:

Cause of death (if known):
